# Supplementary material for: Global translational repression induced by iron deficiency in yeast depends on the Gcn2/eIF2α pathway
Source: PubMed Central journal article supplement (PMC6959253; doi:10.1038/s41598-019-57132-0), 2020-01-14
Supplement: 41598_2019_57132_MOESM1_ESM.pdf [file 41598_2019_57132_MOESM1_ESM.pdf]

**Supplementary Information for the manuscript “Global translational repression induced by iron deficiency in yeast depends on the Gcn2/eIF2 $\alpha$  pathway”**

Antonia María Romero<sup>1</sup>, Lucía Ramos-Alonso<sup>1</sup>, Paula Alepuz<sup>2,3</sup>, Sergi Puig<sup>1\*</sup> and María Teresa Martínez-Pastor<sup>2\*\*</sup>

<sup>1</sup>Departamento de Biotecnología, Instituto de Agroquímica y Tecnología de Alimentos (IATA), Consejo Superior de Investigaciones Científicas (CSIC), Catedrático Agustín Escardino 7, E-46980, Paterna, Valencia, Spain.

<sup>2</sup>Departamento de Bioquímica y Biología Molecular, Universitat de València, Doctor Moliner 50, E-46100, Burjassot, Valencia, Spain.

<sup>3</sup>ERI Biotechmed, Universitat de València, Doctor Moliner 50, E-46100, Burjassot, Valencia, Spain.

\*spuig@iata.csic.es

\*\*maria.teresa.martinez@uv.es

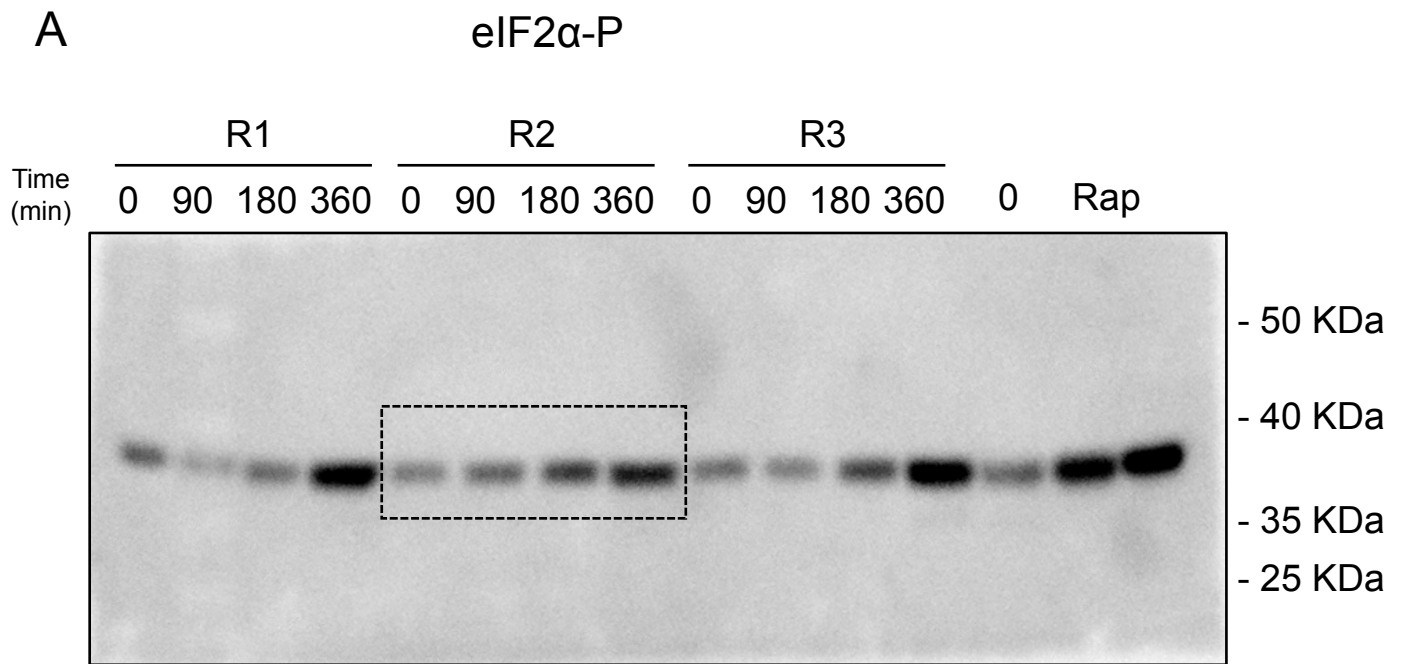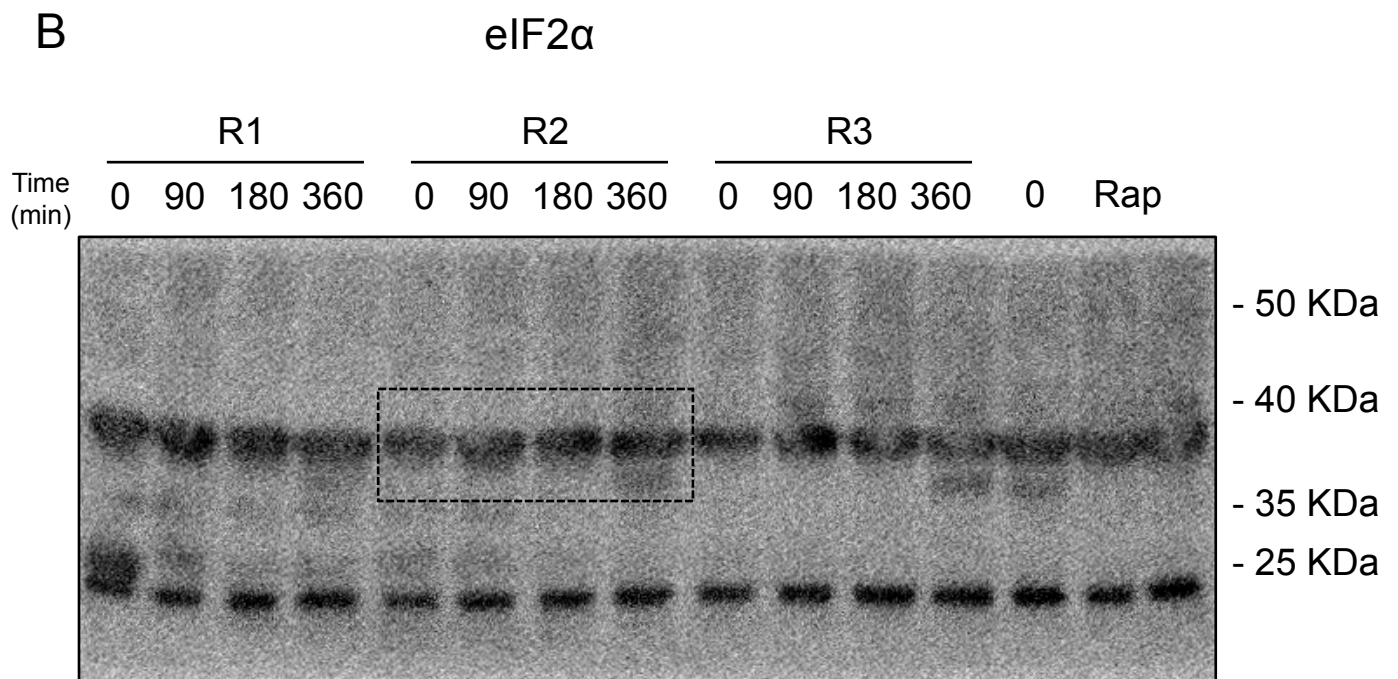

**Supplementary Figure S1.** Full blot image of Figure 3A with cropped regions marked with rectangles. The blots show the phosphorylated eIF2 $\alpha$  (A) and total eIF2 $\alpha$  protein (B) of three biological replicates from cells grown under iron deficiency for the indicated times (R1, R2 and R3). The three lanes on the right show the phosphorylated eIF2 $\alpha$  (A) and total eIF2 $\alpha$  protein (B) of cells untreated (0) or treated with 1  $\mu$ g/mL Rapamycin for 15 min (Rap), as a positive control of eIF2 $\alpha$  phosphorylation.

**A**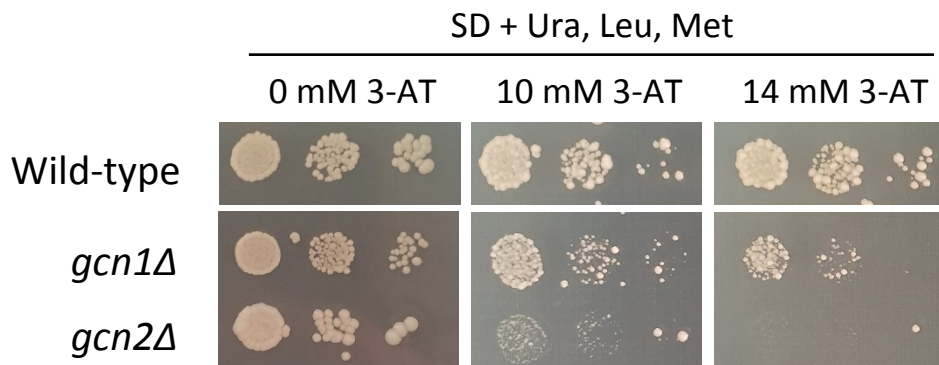**B**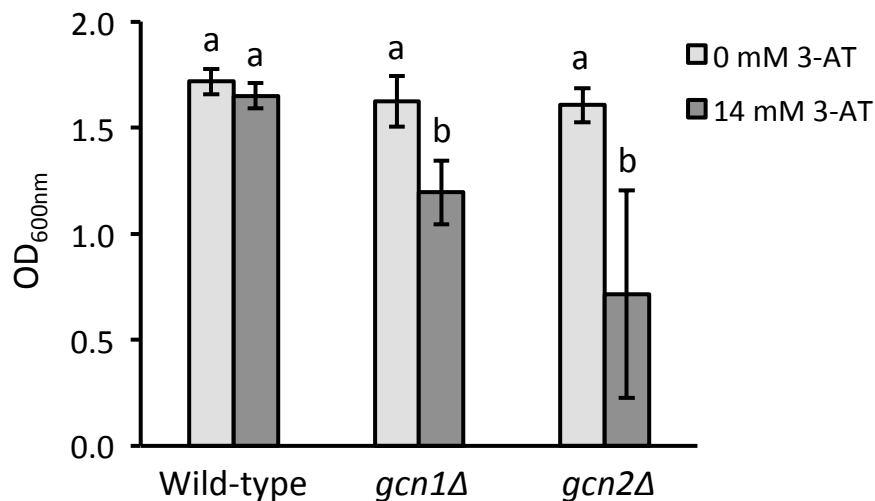

**Supplementary Figure S2. The *gcn2Δ* and *gcn1Δ* mutant strains display a growth defect in the presence of 3-aminotriazole.** Wild-type BY4741, *gcn2Δ* and *gcn1Δ* cells were transformed with pRS413 plasmid, which contains the *HIS3* gene. **(A)** Cells were cultivated overnight in liquid SC-His medium and then spotted in 1:10 dilutions, starting at OD at 600 nm of 0.1, on solid SD + Ura + Leu + Met plates that contained increasing 3-aminotriazole (3-AT) concentrations. Plates were incubated for 3 days at 30°C and photographed. **(B)** Cells were cultivated in liquid SD + Ura + Leu + Met medium without or with 3-AT in a Spectrostar Nano absorbance reader (BMGLabtech) for 3 days at 28°C, and the final OD at 600 nm was registered. Mean values and standard deviations from three biologically independent experiments are shown. Different letters over the bars indicate statistically significant differences ( $p$ -value < 0.05).

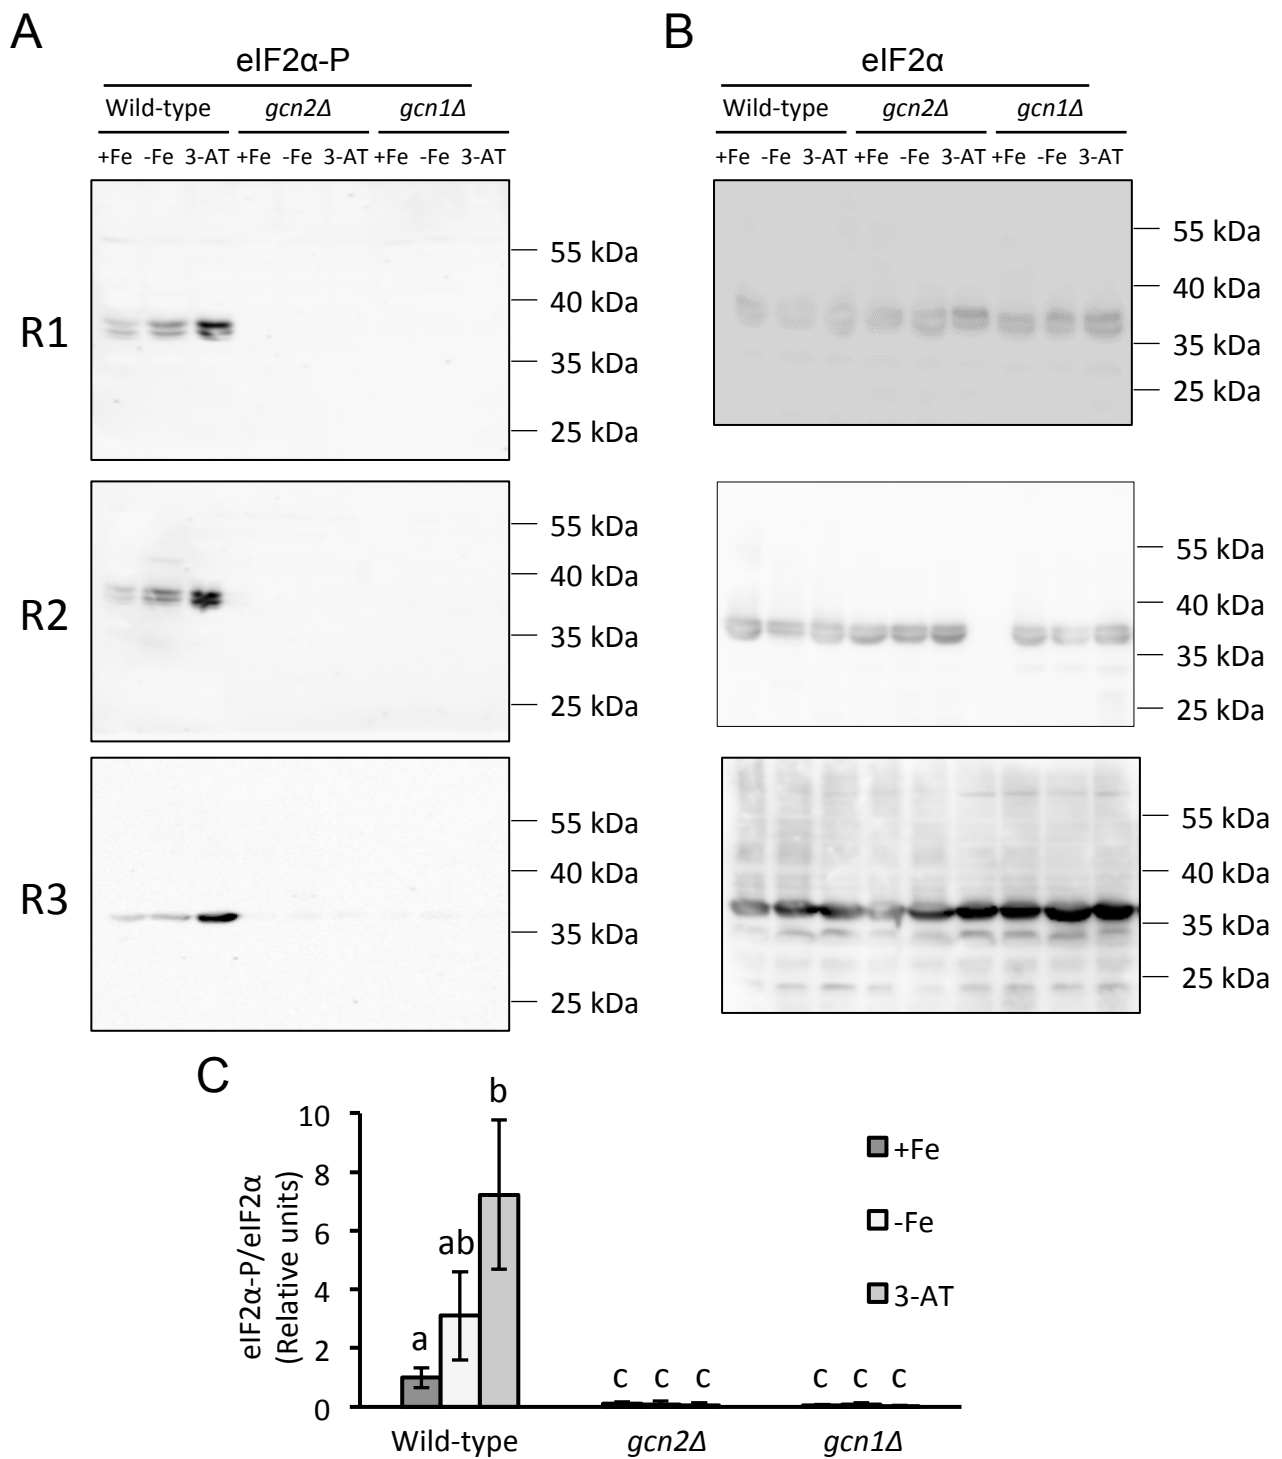

**Supplementary Figure S3. eIF2 $\alpha$  is not phosphorylated in the *gcn2* $\Delta$  and *gcn1* $\Delta$  mutant strains in response to iron deficiency or 3-aminotriazol treatment.** Wild-type BY4741, *gcn2* $\Delta$  and *gcn1* $\Delta$  cells transformed with pRS413 plasmid were cultivated overnight and reisolated in SC-His (+Fe) or SC-His + 100  $\mu$ M BPS (-Fe) for 9 hours, and in SC-His + 30 mM 3-AT for 5 hours. The levels of phosphorylated eIF2 $\alpha$  (A) and total eIF2 $\alpha$  (B) protein were determined by Western blot analyses in three independent biological replicates (R1, R2, R3) using the anti-eIF2 $\alpha$ -Ser51/52 and anti-eIF2 $\alpha$  antibodies, respectively. L: ladder. (C) Quantification of the relative levels of eIF2 $\alpha$ -P/eIF2 $\alpha$ . The average and standard deviation is shown. Different letters over the bars indicate statistically significant differences (p-value < 0.05).

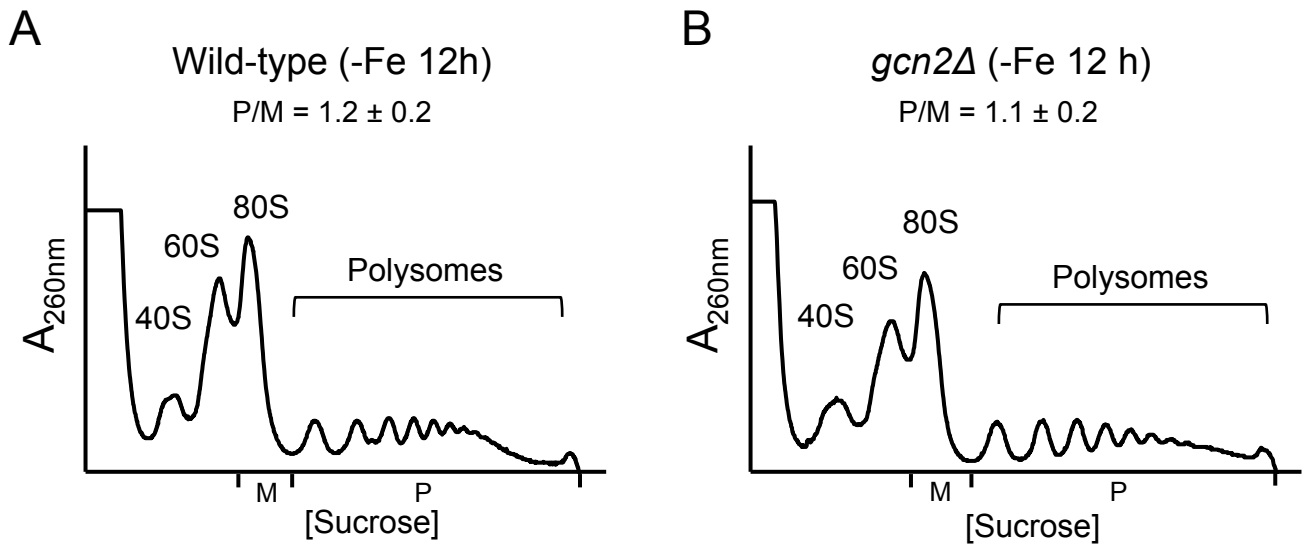

**Supplementary Figure S4. The Gcn2-dependent improvement of translation under iron deficiency is temporary.** Wild-type BY4741 (A) and *gcn2* $\Delta$  (B) strains were cultivated in SC with 100  $\mu$ M BPS (-Fe) for 12 hours. Polysome analyses were performed as described in Figure 1.

**Supplementary Table S1.** List of *Saccharomyces cerevisiae* strains used in this work.

| Strain                 | Description                                                                                           | Source            |
|------------------------|-------------------------------------------------------------------------------------------------------|-------------------|
| <i>W303</i>            | HTLU-2832-1B: <i>MATa, HIS3, TRP1, LEU2, URA3, ADE2, can1</i>                                         | Fred Cross        |
| <i>W303 ura3Δ</i>      | <i>W303 ura3::hphB</i>                                                                                | This study        |
| <i>W303 ura3Δgcn2Δ</i> | <i>W303 ura3::hphB gcn2::KanMX4</i>                                                                   | This study        |
| <i>BY4741</i>          | <i>MATa, his3Δ1, leu2Δ0, met15Δ0, ura3Δ0</i>                                                          | Research Genetics |
| <i>gcn2Δ</i>           | <i>BY4741 gcn2::KanMX4</i>                                                                            | Research Genetics |
| <i>gcn1Δ</i>           | <i>BY4741 gcn1::KanMX4</i>                                                                            | Research Genetics |
| <i>SUI2</i>            | RS-86: <i>MATa, ura3-52, leu2-3,112, trp1 Δ63, Δsui2, Δp919 [SUI2, URA3], pRS414 [SUI2, TRP1]</i>     | 32                |
| <i>SUI2-S51A</i>       | RS-88: <i>MATa, ura3-52, leu2-3,112, trp1Δ63, Δsui2, Δp919 [SUI2, URA3], pRS414 [SU2I-S51A, TRP1]</i> | 32                |

**Supplementary Table S2.** List of oligonucleotides used for RT-qPCR in this work.

| <i>Name</i>   | <i>Sequence (from 5' to 3')</i> |
|---------------|---------------------------------|
| RPS16B-qPCR-F | GACGAACAATCCAAGAACGA            |
| RPS16B-qPCR-R | AGAACGAGCACCCCTTACCAC           |
| RPL3-qPCR-F   | CGAAGCTGTCACCGTTGTTG            |
| RPL3-qPCR-R   | AAATGTTTCAGCCCAGACGGT           |
| ACT1-qPCR-F   | TCGTTCCAATTTACGCTGGTT           |
| ACT1-qPCR-R   | CGGCCAAATCGATTCTCAA             |
| GCN4-qPCR-F   | GACAACTTCATTCTTACCCACTCC        |
| GCN4-qPCR-R   | GATTCGTCATCCTTTCCAACA           |
